# Supplementary material for: Photoactive meso-tetra(4-pyridyl)porphyrin-tetrakis-[chloro(2,2′bipyridine)platinum(ii) derivatives recognize and cleave DNA upon irradiation
Source: Royal Society of Chemistry journal article supplement (doi:10.1039/c6dt04634g), 2016-12-26
Supplement: c6dt04634g1.pdf [file c6dt04634g1.pdf]

## Supplementary Information Section

### Photoactive *meso*-tetra(4-pyridyl)porphyrin-tetrakis-[chloro(2,2'-bipyridine)platinum(II) derivatives recognize and cleave DNA upon irradiation

Vanessa A. Oliveira,<sup>a</sup> Bernardo A. Iglesias,<sup>b</sup> Bruna L. Auras,<sup>c</sup> Ademir Neves<sup>c</sup> and Hernán Terenzi<sup>a</sup>

<sup>a</sup>*Centro de Biologia Molecular Estrutural, Universidade Federal de Santa Catarina, Florianópolis, SC 88040-900, Brazil.*

<sup>b</sup>*Departamento de Química, Universidade Federal de Santa Maria, Santa Maria, RS 97105-900, Brazil.*

<sup>c</sup>*Departamento de Química, Universidade Federal de Santa Catarina, Florianópolis, SC 88040-900, Brazil.*

#### Table of Contents:

|                                                      |           |
|------------------------------------------------------|-----------|
| <b>1. 4-TPyP Electronic absorption spectra .....</b> | <b>2</b>  |
| <b>2. Circular dichroism assays .....</b>            | <b>3</b>  |
| <b>3. 4-TPyP Emission spectra .....</b>              | <b>5</b>  |
| <b>4. Plasmidial DNA cleavage by 4-TPyP .....</b>    | <b>6</b>  |
| <b>5. DNA groove binder .....</b>                    | <b>7</b>  |
| <b>6. ROS scavengers .....</b>                       | <b>8</b>  |
| <b>7. TEMPO .....</b>                                | <b>11</b> |
| <b>8. Anaerobic atmosphere .....</b>                 | <b>12</b> |

## 1. 4-TPyP Electronic absorption spectra

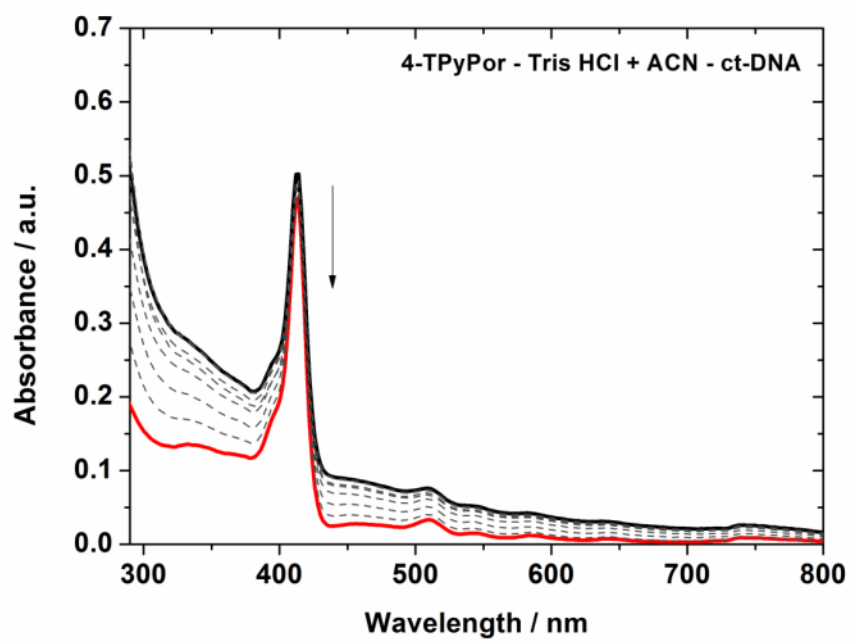

**Figure S1.** Electronic UV-vis absorption spectra of **4-TPyP** (1.0  $\mu\text{M}$ ) with increasing CT-DNA concentrations (0.0 - 10.0  $\mu\text{M}$  bp) in Tris-HCl buffer solution.

## 2. Circular dichroism assays

Table S1. Circular dichroism titrations

| Titration ( $\mu\text{L}$ ) | % CH <sub>3</sub> CN (v/v) | [Complex] ( $\mu\text{M}$ ) | [CT-DNA] ( $\mu\text{M}$ ) | r [complex]/[CT-DNA] |
|-----------------------------|----------------------------|-----------------------------|----------------------------|----------------------|
| 0*                          | 2.0%                       | 0.00                        | 200.00                     | 0.00                 |
| 06                          | 3.5%                       | 7.39                        | 197.04                     | 0.04                 |
| 16                          | 6.0%                       | 19.23                       | 192.31                     | 0.10                 |
| 26                          | 8.5%                       | 30.52                       | 187.79                     | 0.16                 |
| 36                          | 11.0%                      | 41.28                       | 183.49                     | 0.23                 |
| 46                          | 13.5%                      | 51.57                       | 179.37                     | 0.29                 |
| 56                          | 16.0%                      | 61.40                       | 175.44                     | 0.35                 |
| 66                          | 18.5%                      | 70.82                       | 171.67                     | 0.41                 |

\*Initial reaction: CT-DNA (200.0  $\mu\text{M}$  bp) in Tris-HCl (10.0 mM pH 7.4) and 2.0% (v/v) acetonitrile solution.

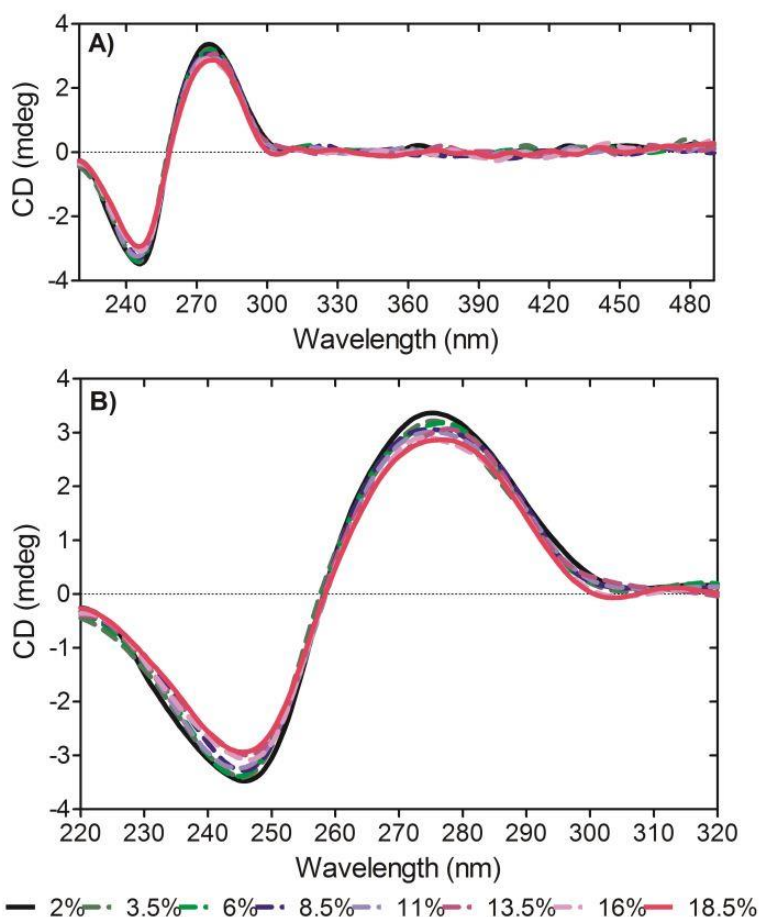

**Figure S2.** Acetonitrile dilution CD spectra. Initial reaction: CT-DNA (200.0  $\mu\text{M}$  bp) in Tris-HCl (10.0 mM pH 7.4) and 2.0% (v/v) acetonitrile solution. The initial reaction was titrated with increased volumes of acetonitrile as demonstrated in Table S1.

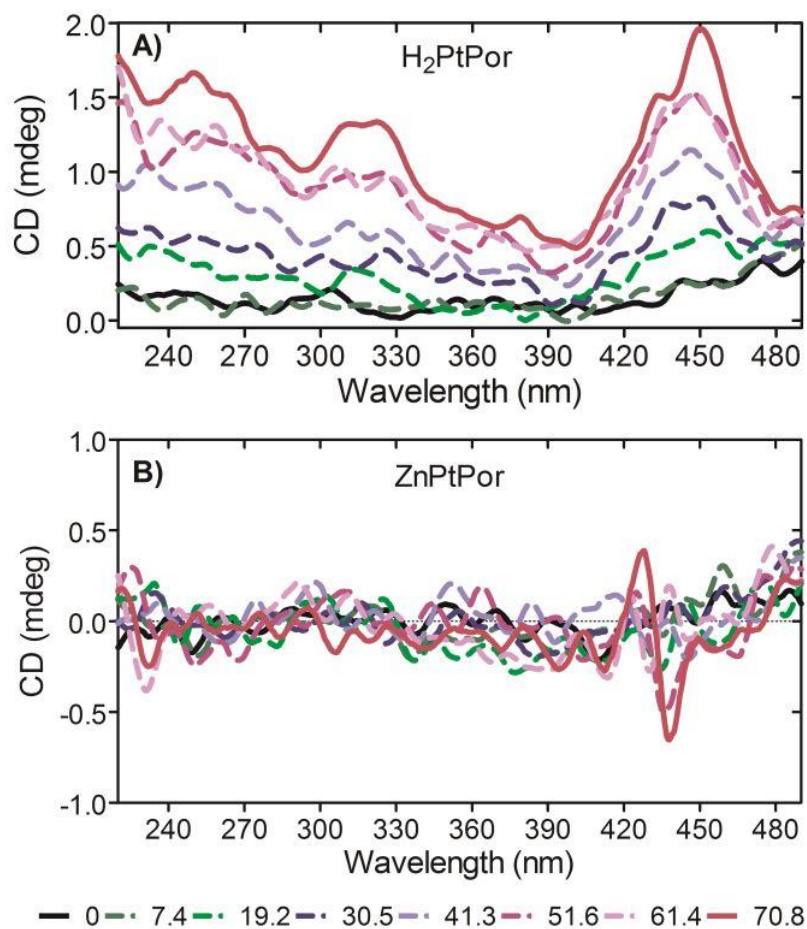

**Figure S3.** CD spectra of A) **H<sub>2</sub>PtPor** and B) **ZnPtPor** titration into buffer. Initial reaction: Tris-HCl (10.0 mM pH 7.4) and 2.0% (v/v) acetonitrile solution. The initial reaction was titrated with increased amounts of complexes as indicated in Table S1.

### 3. 4-TPyP Emission spectra

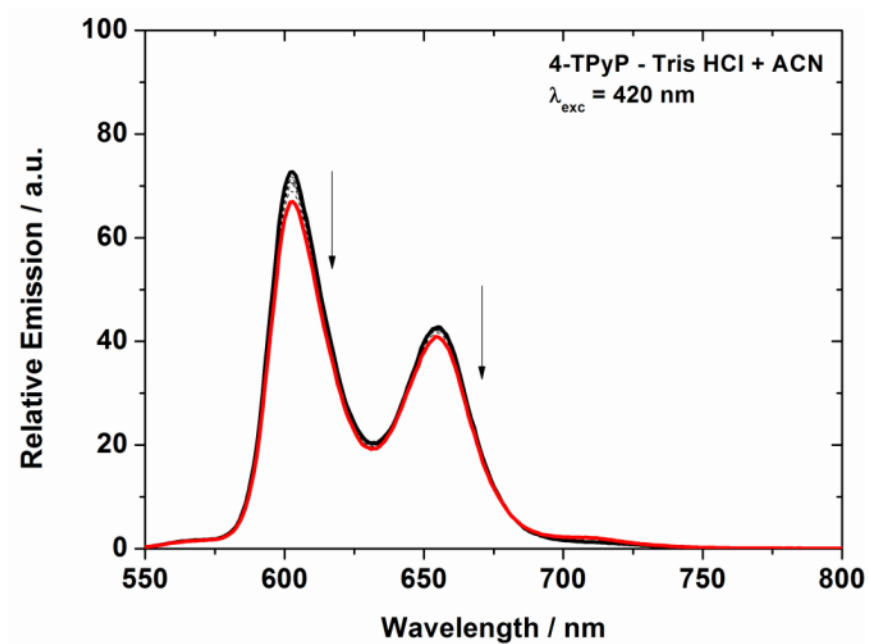

**Figure S4.** Emission spectra of **4-TPyP** (1.0  $\mu\text{M}$ ) with increasing CT-DNA concentrations (0.0 - 10.0  $\mu\text{M}$  bp) in Tris-HCl buffer solution. ( $\lambda_{exc} = 420 \text{ nm}$ ).

#### 4. Plasmidial DNA cleavage by 4-TPyP

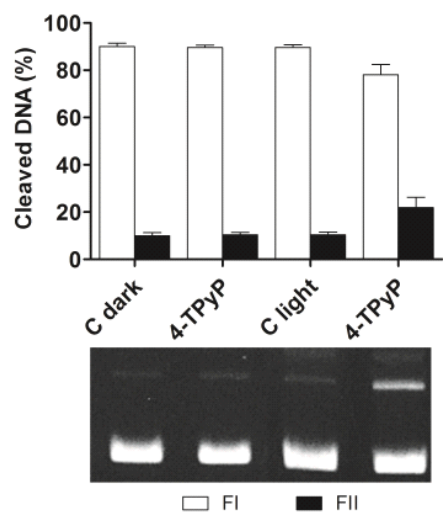

**Figure S5.** DNA cleavage by the precursor **4-TPyP**. Standard reactions: plasmid DNA (~25  $\mu$ M bp), Tris-HCl (10 mM pH 7.4), 25 % (v/v) acetonitrile at 37°C. **4-TPyP** was added (3  $\mu$ M final concentration). The dark reactions were incubated for 24 hours in absence of light while the irradiated trials were incubated for 90 minutes under visible light. Data represent mean and SD.

## 5. DNA groove binders

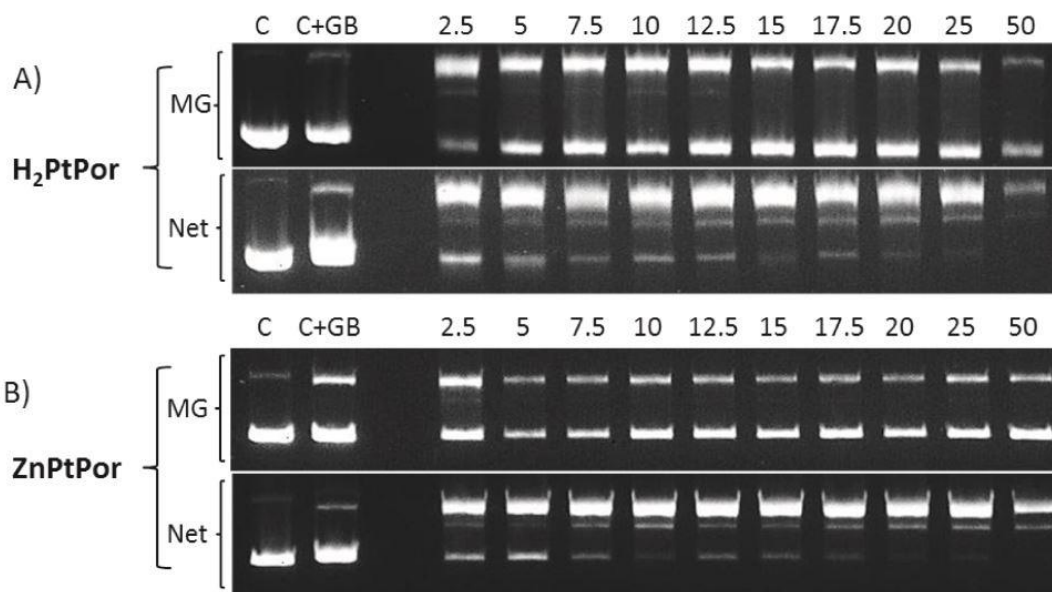

**Figure S6.** Influence of DNA groove binders in the DNA cleavage reaction. Standard reactions carried out in the presence of groove binders. *Standard reactions:* plasmid DNA ( $\sim 25.0 \mu\text{M}$  bp), Tris-HCl (10.0 mM pH 7.4), 25% (v/v) acetonitrile solution. Pt(II)-porphyrins: A) **H<sub>2</sub>PtPor** and B) **ZnPtPor** (4.0  $\mu\text{M}$  final concentration). Groove binders: methyl green (MG) or netropsin (Net) were added to reactions. C – control without porphyrin; C+GB – control + corresponding groove binder. Groove binder concentration curve: 2.5 – 50  $\mu\text{M}$ . All samples were incubated for 90 minutes at 37°C under visible light.

## 6. ROS scavengers

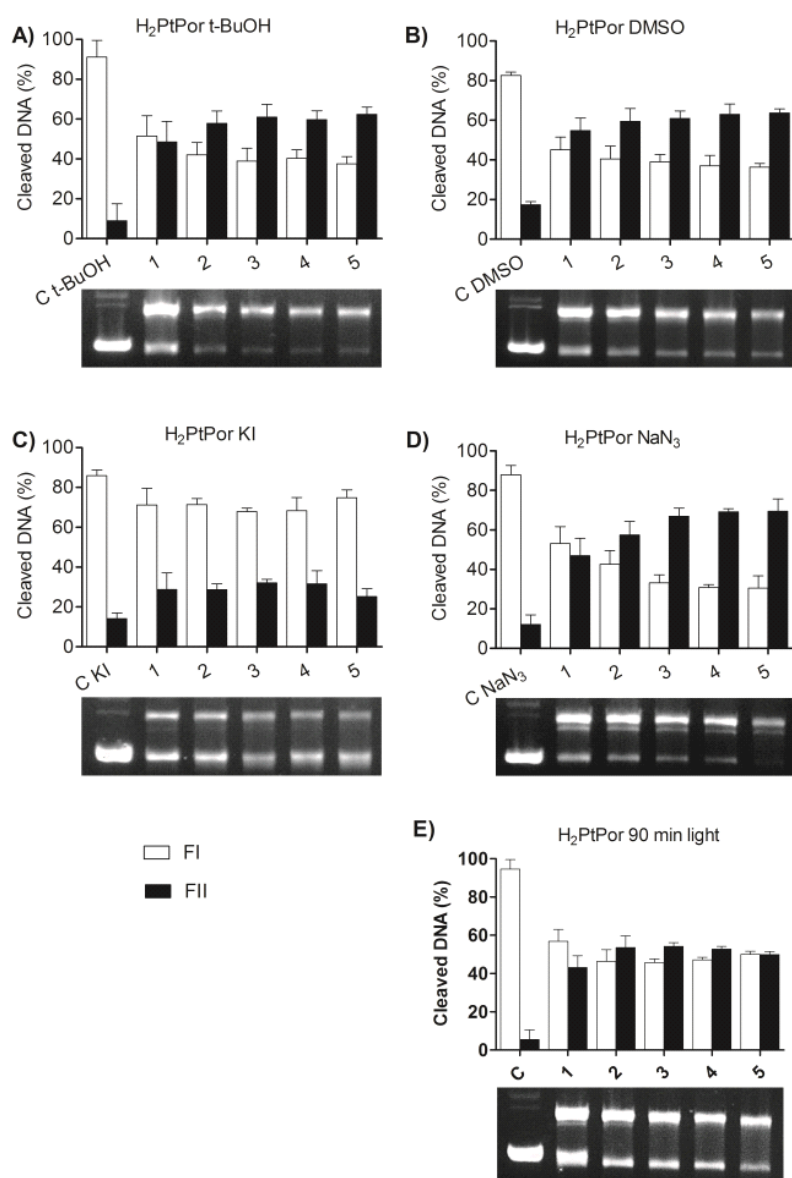

**Figure S7.** Plasmid-H<sub>2</sub>PtPor reactions carried out in the presence of ROS scavengers. *Standard reactions:* H<sub>2</sub>PtPor concentration curve (0.0-5.0  $\mu$ M), plasmid DNA ( $\sim$ 25.0  $\mu$ M bp), Tris-HCl (10.0 mM pH 7.4), 25% (v/v) acetonitrile. *Scavengers added:* A) *t*-BuOH (0.8 mM), B) KI (8.0 mM), C) NaN<sub>3</sub> (8.0 mM) and D) DMSO (0.8 mM). E) Control reactions without scavengers (from Figure 7, our manuscript). C – control + corresponding scavenger. All samples were incubated for 90 minutes at 37°C under visible light. Data represent mean and SD.



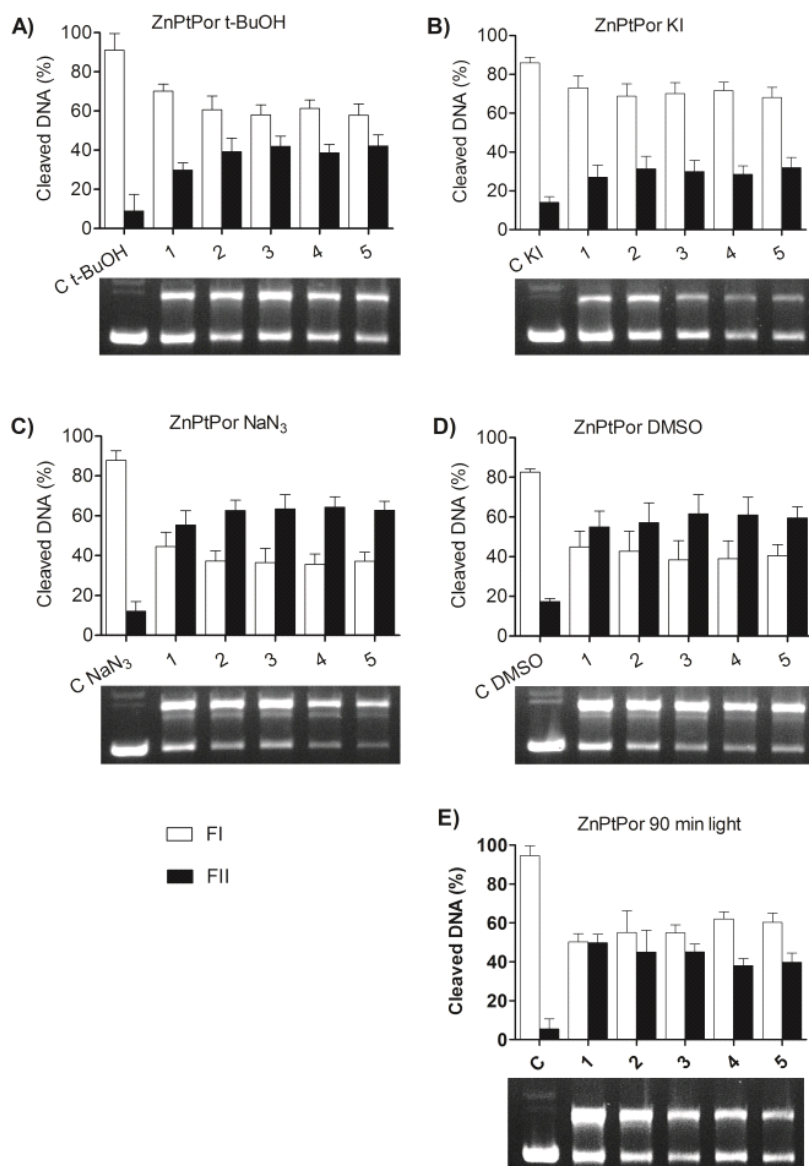

**Figure S8.** Plasmid-ZnPtPor reactions carried out in the presence of ROS scavengers. *Standard reactions:* ZnPtPor concentration curve (0.0-5.0  $\mu\text{M}$ ), plasmid DNA ( $\sim 25.0 \mu\text{M}$  bp), Tris-HCl (10.0 mM pH 7.4), 25% (v/v) acetonitrile. *Scavengers added:* A) *t*-BuOH (0.8 mM), B) KI (8.0 mM), C)  $\text{NaN}_3$  (8.0 mM) and D) DMSO (0.8 mM). E) control reactions without scavengers (from Figure 7, our manuscript). C – control + corresponding scavenger. All samples were incubated for 90 minutes at 37°C under visible light. Data represent mean and SD.

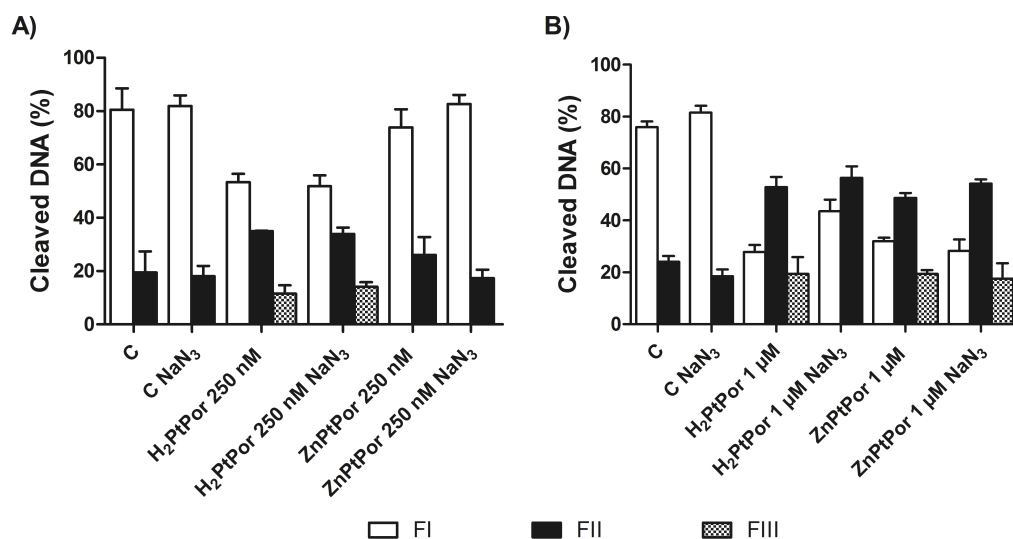

**Figure S9.** Plasmid-H<sub>2</sub>PtPor and ZnPtPor reactions carried out in the presence of NaN<sub>3</sub> (8.0 mM). *Standard reactions:* H<sub>2</sub>PtPor or ZnPtPor (250 nM (A) and 1 μM (B)), plasmid DNA (~25.0 μM bp), Tris-HCl (10.0 mM pH 7.4), 25% (v/v) acetonitrile. *Scavenger added:* NaN<sub>3</sub> (8.0 mM). C – control + NaN<sub>3</sub> (8.0 mM). All samples were incubated for 90 minutes at 37°C under visible light. Data represent mean and SD.

## 7. TEMPO

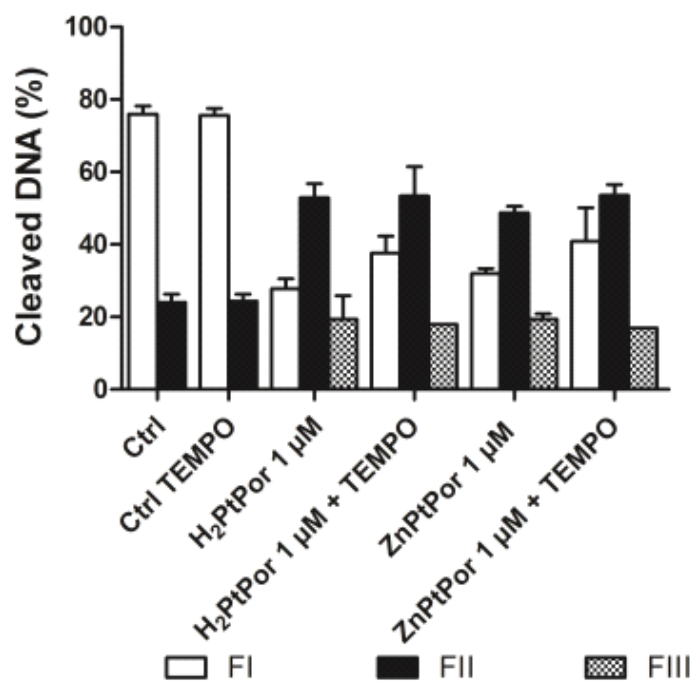

**Figure S10.** Plasmid-H<sub>2</sub>PtPor and ZnPtPor reactions carried out in the presence of TEMPO. *Standard reactions:* H<sub>2</sub>PtPor or ZnPtPor (1 μM), plasmid DNA (~25.0 μM bp), Tris-HCl (10.0 mM pH 7.4), 25% (v/v) acetonitrile. *Scavenger added:* TEMPO (2,2,6,6-tetramethyl-1-piperidine-1-oxyl) (0.5 mM). Ctrl – control without porphyrin Ctrl + TEMPO – control + TEMPO (0.5 mM). All samples were incubated for 90 minutes at 37°C under visible light. Data represent mean and SD.

## 8. Anaerobic Atmosphere

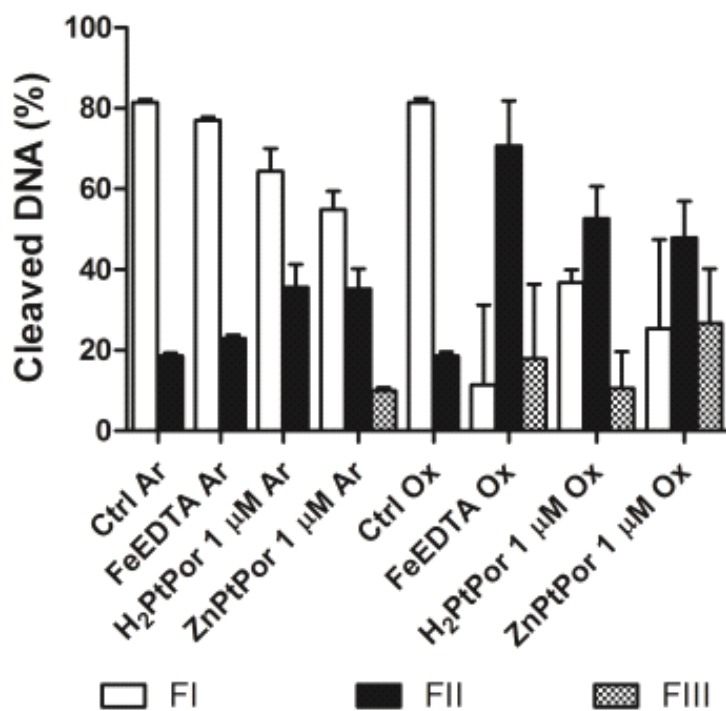

**Figure S11.** Argon atmosphere trials. Plasmid-**H<sub>2</sub>PtPor** and **ZnPtPor** reactions carried out in argon (Ar) and oxygen (Ox) atmosphere. *Standard reactions:* **H<sub>2</sub>PtPor** or **ZnPtPor** (1 μM), plasmid DNA (~25.0 μM bp), Tris-HCl (10.0 mM pH 7.4), 25% (v/v) acetonitrile. Ctrl – control without porphyrin. FeEDTA – control + FeEDTA (100 μM) + DTT (1,4 – dithiothreitol; 10 mM). All samples were incubated for 90 minutes at 37°C under visible light. Data represent mean and SD.

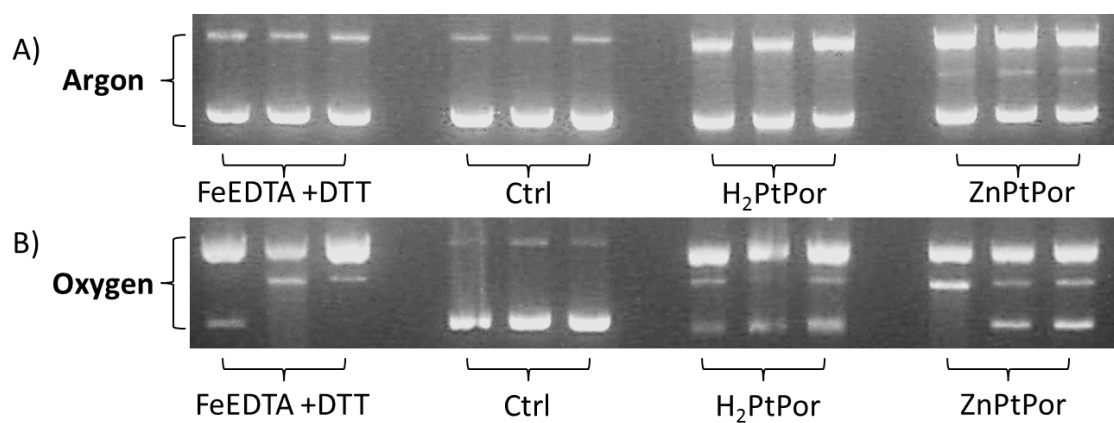

**Figure S12.** Agarose gel electrophoresis images of argon atmosphere trials. Plasmid-**H<sub>2</sub>PtPor** and **ZnPtPor** reactions carried out in argon (Ar) and oxygen (Ox) atmosphere. *Standard reactions:* **H<sub>2</sub>PtPor** or **ZnPtPor** (1  $\mu$ M), plasmid DNA ( $\sim$ 25.0  $\mu$ M bp), Tris-HCl (10.0 mM pH 7.4), 25% (v/v) acetonitrile. Ctrl – control without porphyrin. FeEDTA – control + FeEDTA (100  $\mu$ M) + DTT (1,4 – dithiothreitol; 10 mM). All samples were incubated for 90 minutes at 37°C under visible light.
